# Supplementary material
Source: PubMed Central journal article supplement (PMC4313166)
Supplement: JCM.01320-14_zjm999093709so1.pdf [file JCM.01320-14_zjm999093709so1.pdf]

Supplementary Table 1. Comparison of selected genes detected by microarray in the cohort according to methicillin susceptibility.

| <i>Variable</i>                     | <i>MSSA</i><br><i>n=138</i> | <i>MRSA</i><br><i>n=108</i> | <i>Total</i><br><i>n=242</i> | <i>p-value</i> |
|-------------------------------------|-----------------------------|-----------------------------|------------------------------|----------------|
| <i>agr</i> type                     |                             |                             |                              |                |
| <i>agr</i> I                        | 60 (43.5)                   | 86 (82.7)                   | 146                          | <0.001         |
| <i>agr</i> II                       | 39 (28.3)                   | 6 (5.8)                     | 45                           | <0.001         |
| <i>agr</i> III                      | 38 (27.5)                   | 10 (9.6)                    | 48                           | 0.001          |
| <i>agr</i> IV                       | 1 (0.7)                     | 2 (1.9)                     | 3                            | 0.404          |
| <i>agr</i> dysfunction <sup>1</sup> |                             |                             |                              |                |
| Present                             | 56 (40.6)                   | 68 (65.4)                   | 124                          | <0.001         |
| Polysaccharide capsule              |                             |                             |                              |                |
| <i>cap5</i>                         | 44 (31.9)                   | 25 (24.0)                   | 69                           | 0.181          |
| <i>cap8</i>                         | 93 (67.4)                   | 78 (75)                     | 171                          | 0.198          |
| Antimicrobial resistance            |                             |                             |                              |                |
| <i>blaZ</i>                         | 106 (77.4)                  | 102 (98.1)                  | 208                          | <0.001         |
| <i>mecA</i>                         | 0 (0)                       | 101 (97.1)                  | 101                          | <0.001         |
| <i>ermA</i>                         | 9 (6.5)                     | 64 (61.5)                   | 73                           | <0.001         |
| <i>aacA-aphD</i>                    | 2 (1.5)                     | 59 (58.4)                   | 61                           | <0.001         |
| <i>mupR</i>                         | 0 (0)                       | 1 (1.0)                     | 1                            | 0.248          |
| <i>tetK</i>                         | 0 (0)                       | 41 (40.2)                   | 41                           | <0.001         |
| <i>fosB</i>                         | 78 (56.5)                   | 71 (68.3)                   | 149                          | 0.063          |
| <i>qacA</i>                         | 9 (6.6)                     | 53 (51.5)                   | 62                           | <0.001         |

| Leukocidins or exotoxins |                         |            |           |     |        |
|--------------------------|-------------------------|------------|-----------|-----|--------|
|                          | PVL                     | 3 (2.2)    | 4 (3.9)   | 7   | 0.442  |
|                          | <i>tst</i>              | 13 (9.4)   | 2 (1.9)   | 15  | 0.017  |
| Enterotoxins             |                         |            |           |     |        |
|                          | <i>sea</i>              | 39 (28.3)  | 59 (56.7) | 98  | <0.001 |
|                          | <i>seb</i>              | 12 (8.9)   | 3 (3.0)   | 15  | 0.071  |
|                          | <i>sec</i>              | 9 (6.5)    | 16 (15.4) | 25  | 0.025  |
|                          | <i>seg</i> <sup>2</sup> | 57 (41.6)  | 33 (32.0) | 90  | 0.130  |
| Exfoliative toxins       |                         |            |           |     |        |
|                          | <i>etA</i>              | 2 (1.5)    | 1 (1.0)   | 3   | 0.740  |
| Adhesion factors         |                         |            |           |     |        |
|                          | <i>clfA</i>             | 25 (18.1)  | 54 (51.9) | 79  | <0.001 |
|                          | <i>cna</i>              | 61 (44.9)  | 92 (88.5) | 153 | <0.001 |
| Miscellaneous            |                         |            |           |     |        |
|                          | ACME locus              | 0 (0)      | 23 (22.1) | 23  | <0.001 |
|                          | <i>sak</i>              | 122 (88.4) | 93 (89.4) | 215 | 0.803  |
|                          | CHIPS                   | 76 (55.1)  | 31 (29.8) | 107 | <0.001 |
|                          | <i>isaB</i>             | 110 (79.7) | 15 (14.4) | 125 | <0.001 |
|                          | <i>splA</i>             | 106 (76.8) | 75 (72.1) | 181 | 0.405  |

Data are represented as number (%) unless otherwise indicated.

MSSA, methicillin-susceptible *S. aureus*

MRSA, methicillin-resistant *S. aureus*

PVL, Panton-Valentine leukocidin

ACME, arginine catabolic mobile element

CHIPS, chemotaxis inhibitory protein of *S. aureus*

<sup>1</sup> As measured by delta-hemolysin assay.

<sup>2</sup> Part of enterotoxin gene cluster (*egc*).

Supplementary Figure 1. Vancomycin Etest® MIC<sub>50</sub> and MIC<sub>90</sub> according to clonal complex.

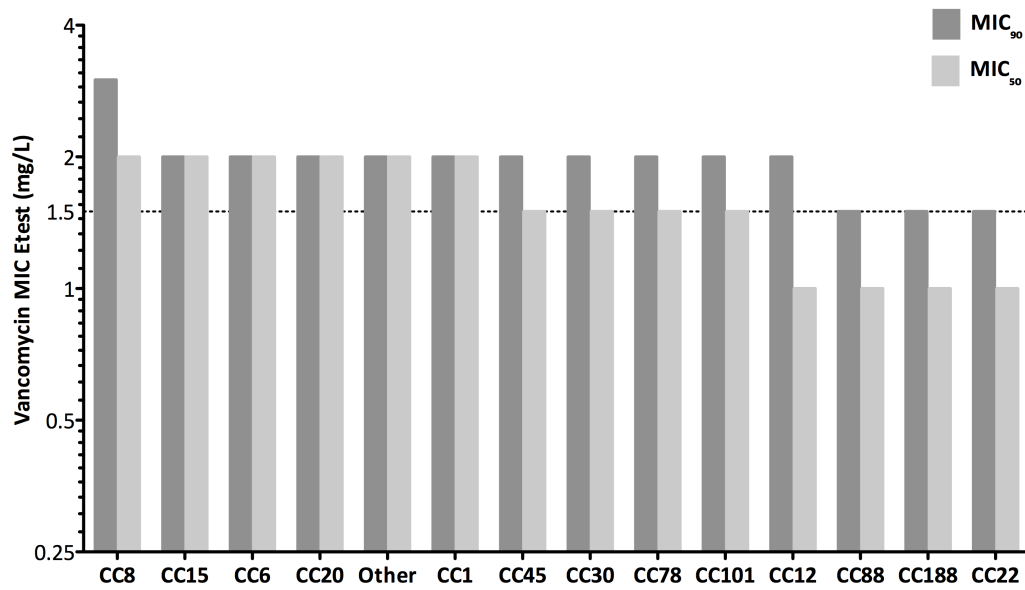

‘Other’ clones (n=21): CC7, CC9, CC25, CC50, CC59, CC80, ST93, CC97, CC361, CC398; y-axis is on a log<sub>2</sub> scale.
